# Supplementary material for: Optimization of cooperative spectrum sensing with sensing user selection in cognitive radio networks
Source: Springer Nature journal article supplement (doi:10.1186/1687-1499-2011-208), 2011-12-01

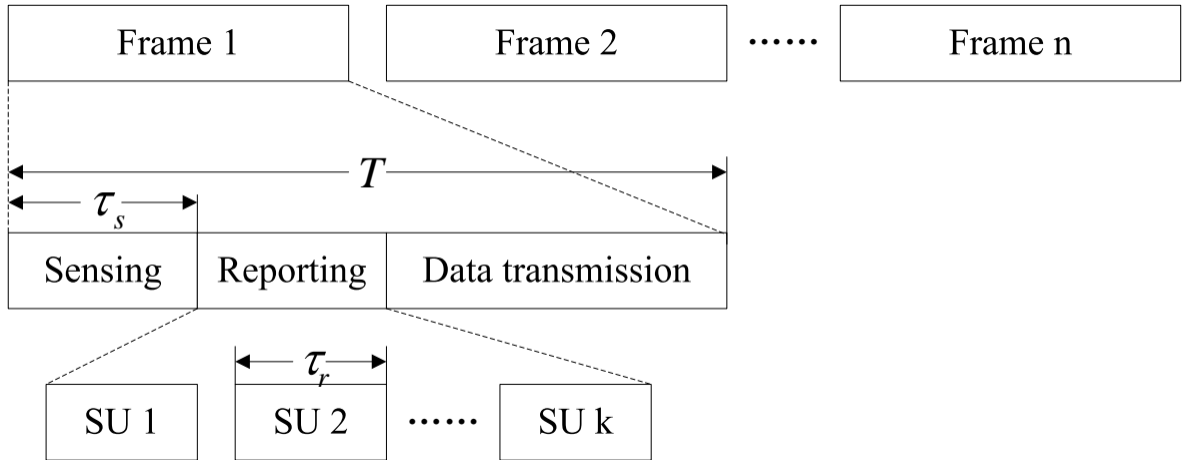

Supplement: 13638_2011_203_MOESM1_ESM.pdf [file 13638_2011_203_MOESM1_ESM.pdf]
